# Supplementary material
Source: PubMed Central journal article supplement (PMC9254162)
Supplement: NIHMS1809806-supplement-Supplement1.pdf [file NIHMS1809806-supplement-Supplement1.pdf]

## Supplemental Tables

### Characterization of the mechanistic linkages between iodothyronine deiodinase inhibition and impaired thyroid-mediated growth and development in *Xenopus laevis* using iopanoic acid.

Jonathan T. Haselman<sup>1\*</sup>, Jennifer H. Olker<sup>1</sup>, Patricia A. Kosian<sup>1,2</sup>, Joseph J. Korte<sup>1,2</sup>, Jeffrey S. Denny<sup>1,2</sup>, Joseph E. Tietge<sup>1,2</sup>, Michael W. Hornung<sup>1</sup>, Sigmund J. Degitz<sup>1</sup>.

<sup>1</sup>U.S. Environmental Protection Agency, Office of Research and Development, Center for Computational Toxicology and Exposure, Great Lakes Toxicology and Ecology Division, Duluth, Minnesota 55804

<sup>2</sup>Retired

Table S1. Iodothyronine deiodinase in vitro enzyme assay conditions.

|                                                            | hDIO1    | hDIO2  | hDIO3  | xDIO3  |
|------------------------------------------------------------|----------|--------|--------|--------|
| Final protein concentration<br>[containing enzyme] (µg/mL) | 15.85    | 125    | 14.5   | 141.25 |
| HEPES (M)                                                  | 0.1      | 0.1    | 0.1    | 0.1    |
| pH                                                         | 7        | 7      | 8      | 7.5    |
| EDTA (mM)                                                  | 1        | 1      | 1      | 1      |
| DTT (mM)                                                   | 40       | 40     | 40     | 40     |
| Substrate (µM)                                             | 10 (rT3) | 5 (T4) | 5 (T3) | 5 (T3) |
| DMSO (%)                                                   | 1        | 1      | 1      | 1      |
| Total assay volume (µl)                                    | 200      | 200    | 200    | 120    |

Table S2. Water quality parameters summarized across all replicate tanks throughout the IOP in vivo exposure.

|      | Temp<br>(°C) | D.O.<br>(mg L <sup>-1</sup> ) | % O <sub>2</sub> Sat. | pH  | Conductivity<br>(μS cm <sup>-1</sup> ) | Alkalinity<br>(mg CaCO <sub>3</sub> L <sup>-1</sup> ) | Hardness<br>(mg CaCO <sub>3</sub> L <sup>-1</sup> ) |
|------|--------------|-------------------------------|-----------------------|-----|----------------------------------------|-------------------------------------------------------|-----------------------------------------------------|
| Mean | 21.3         | 6.8                           | 76.5                  | 7.3 | 107.1                                  | 45.1                                                  | 46.3                                                |
| SD   | 0.2          | 0.4                           | 4.0                   | 0.1 | 4.4                                    | 2.7                                                   | 2.0                                                 |
| Min. | 20.8         | 6.0                           | 68.0                  | 7.1 | 98.8                                   | 38.0                                                  | 41.0                                                |
| Max. | 21.7         | 7.4                           | 83.6                  | 7.6 | 113.3                                  | 50.0                                                  | 49.0                                                |
| N    | 60           | 60                            | 60                    | 60  | 60                                     | 12                                                    | 12                                                  |

Table S3. *X. laevis* iodothyronine deiodinase gene sequence resources and QPCR assay oligonucleotide sequences.

| Gene name                         | Gene symbol   | GenBank accession<br>(primary accession) | Primer/Probe | Sequence (5' → 3') <sup>a</sup>                      |
|-----------------------------------|---------------|------------------------------------------|--------------|------------------------------------------------------|
| Type I iodothyronine deiodinase   | <i>dio1</i>   | NM_001095667.2<br>(BX844453.1)           | Forward      | TCTCCAGGATCGGCTTGCT                                  |
|                                   |               |                                          | Reverse      | TGTGTCTAACACTACTGGGCAAGAA                            |
|                                   |               |                                          | Probe        | FAM-CAGCCAAACGCTTGATGGAAGAGTCA-BHQ1 <sup>b</sup>     |
| Type II iodothyronine deiodinase  | <i>dio2.L</i> | NM_001353451.1<br>(AF354707.1)           | Forward      | TGTTGCTGACTGCATGGACAA                                |
|                                   |               |                                          | Reverse      | CAATCTTTTGCCTCTGTACAATACATACT                        |
|                                   |               |                                          | Probe        | FAM-TGCCAATGTTGCCTATGGTGTCTCTTTTGA-BHQ1 <sup>b</sup> |
| Type III iodothyronine deiodinase | <i>dio3.L</i> | NM_001087863.2<br>(L28111.1)             | Forward      | TGCCTGCAAGCCTATCG                                    |
|                                   |               |                                          | Reverse      | TCTATGTACACCAGCAGGAAATCC                             |
|                                   |               |                                          | Probe        | FAM-CAGCCCAGCACGTTGGCATCG-BHQ1 <sup>b</sup>          |

<sup>a</sup> All primers and probes were obtained from Integrated DNA Technologies (Corralville, IA, USA)

<sup>b</sup> Black hole quencher-1
